# Supplementary material
Source: publisher figshare collection journal article supplement (https://tandf.figshare.com/ndownloader/files/15280154)
Supplement: Supplementary file 1 [file 15280154]

Appendix A. Current velocity and direction measured by Acoustic Wave and Current Meter (AWAC) at Tinggi and Sibu islands, Malaysia. Currents were recorded during ebb tide (solid arrow; top AWAC image) and flood tide (open arrow; bottom AWAC image). Lines perpendicular to shore represents seaward deployment of AWAC. Black bands in right panel pictures represent travel time in minutes when AWAC made no recordings.

Appendix B. Sampling time and mean (± SD) depth, temperature, salinity, dissolved oxygen, and chlorophyll *a* concentrations at three sampling sites and stations (inshore and offshore) in Tinggi and Sibu Islands, Malaysia.

| Site | Time | Depth | Temperature | Salinity | Dissolved | Chlorophyll *a* |
| --- | --- | --- | --- | --- | --- | --- |
|  |  | (m) | (oC) | PSU | Oxygen | (mg/L) |
|  |  |  |  |  | (mg/L) |  |
| *Sibu Island* | |  |  |  |  |  |
|  |  |  |  |  |  |  |
| Coral | 10:00-14:00 | 6.0 ± 0.0 | 29.8 ± 0.16 | 32.6 ± 0.01 | 7.06 ± 0.38 | 0.43 ± 0.00 |
| Inshore | 19:00-23:00 | 5.0 ± 0.7 | 29.9 ± 0.03 | 32.5 ± 0.00 | 7.08 ± 0.18 | 0.75 ± 1.01 |
|  | 10:00-14:00 | 6.0 ± 0.0 | 30.0 ± 0.14 | 32.6 ± 0.00 | 7.18 ± 0.45 | 0.43 ± 0.59 |
|  | 19:02-23:00 | 5.0 ± 0.0 | 30.0 ± 0.02 | 32.6 ± 0.00 | 6.98 ± 0.18 | 0.75 ± 0.00 |
| Coral | 10:48-14:50 | 8.0 ± 0.0 | 29.8 ± 0.04 | 32.6 ± 0.05 | 7.05 ± 0.06 | 0.80 ± 0.98 |
| Offshore | 19:41-23:43 | 8.0 ± 0.0 | 29.9 ± 0.03 | 32.6 ± 0.00 | 7.09 ± 0.10 | 0.87 ± 0.75 |
|  | 10:29-14:30 | 8.0 ± 0.0 | 29.9 ± 0.21 | 32.6 ± 0.02 | 7.32 ± 0.19 | 0.96 ± 0.64 |
|  | 19:30-23:40 | 8.0 ± 0.0 | 29.9 ± 0.03 | 32.6 ± 0.02 | 7.26 ± 0.17 | 0.87 ± 0.00 |
| Sand | 10:00-14:00 | 5.5 ± 1.4 | 30.0 ± 0.12 | 34.2 ± 0.03 | 7.12 ± 0.20 | 0.61 ± 0.62 |
| Inshore | 19:11-23:20 | 3.8 ± 0.0 | 30.0 ± 0.02 | 34.3 ± 0.00 | 7.11 ± 0.15 | 0.43 ± 0.52 |
|  | 10:22-14:33 | 4.7 ± 1.4 | 30.3 ± 0.18 | 33.8 ± 0.03 | 7.30 ± 0.22 | 0.61 ± 0.00 |
|  | 19:01-23:00 | 5.5 ± 0.7 | 30.1 ± 0.00 | 34.2 ± 0.03 | 7.35 ± 0.06 | 0.43 ± 0.00 |
| Sand | 10:53-14:58 | 8.4 ± 0.0 | 30.0 ± 0.14 | 34.1 ± 0.03 | 7.34 ± 0.16 | 0.29 ± 0.01 |
| Offshore | 19:44-23:44 | 8.0 ± 0.0 | 30.1 ± 0.12 | 34.3 ± 0.03 | 7.40 ± 0.14 | 0.55 ± 0.18 |
|  | 10:22-14:31 | 8.0 ± 0.0 | 30.2 ± 0.28 | 33.8 ± 0.03 | 7.47 ± 0.12 | 0.22 ± 0.00 |
|  | 19:30-23:45 | 8.0 ± 0.0 | 30.1 ± 0.00 | 34.2 ± 0.00 | 7.30 ± 0.07 | 0.55 ± 0.00 |
|  |  |  |  |  |  |  |
| *Tinggi Island* | |  |  |  |  |  |
|  |  |  |  |  |  |  |
| Seagrass | 10:00-14:00 | 3.0 ± 1.4 | 29.7 ± 0.05 | 32.7 ± 0.01 | 3.77 ± 0.22 | 0.49 ± 0.30 |
| Inshore | 19:00-23:00 | 3.0 ± 1.4 | 29.7 ± 0.06 | 32.7 ± 0.00 | 5.14 ± 0.33 | 0.21 ± 0.16 |
|  | 10:03-14:00 | 5.5 ± 0.7 | 30.0 ± 0.15 | 32.7 ± 0.01 | 5.06 ± 0.28 | 0.46 ± 0.31 |
|  | 19:00-23:00 | 5.5 ± 2.1 | 29.6 ± 0.01 | 32.7 ± 0.00 | 4.59 ± 0.48 | 0.52 ± 0.38 |
| Seagrass | 10:40-14:36 | 8.0 ± 0.0 | 29.7 ± 0.16 | 32.7 ± 0.01 | 4.65 ± 0.29 | 0.15 ± 0.21 |
| Offshore | 19:29-23:35 | 8.0 ± 0.0 | 29.6 ± 0.05 | 32.7 ± 0.00 | 4.22 ± 0.65 | 0.90 ± 0.26 |
|  | 10:35-14:25 | 8.0 ± 0.0 | 29.7 ± 0.12 | 32.7 ± 0.01 | 4.13 ± 0.92 | 0.38 ±0.39 |
|  | 19:18-23:23 | 8.0 ± 0.0 | 29.5 ± 0.04 | 32.7 ± 0.01 | 4.26 ± 0.52 | 0.91 ±0.00 |

Appendix C. Mean (± SE) species richness (*S*), Pielou’s evenness index (*J'*), and Shannon diversity index (*H'*) of small and large copepod communities from inshore and offshore (O) sites collected at daytime (D) and nighttime (N) from coral (C) and sand (S) habitats in Sibu Island and seagrass (G) habitat in Tinggi Island, Malaysia.

| **Small Fraction** | |  |  |  |  |  |  |  |
| --- | --- | --- | --- | --- | --- | --- | --- | --- |
| *Onshore* |  |  |  |  | *Offshore* |  |  |  |
| Sample | *S* | *J'* | *H'* |  | Sample | *S* | *J'* | *H'* |
| D1C | 9.7 ± 2.1 | 0.63 ± 0.2 | 1.4 ± 0.4 |  | D1CO | 9.7 ± 0.6 | 0.74 ± 0.0 | 1.7 ± 0.0 |
| N1C | 10.3 ± 0.9 | 0.67 ± 0.1 | 1.6 ± 0.1 |  | N1CO | 10.7 ± 1.5 | 0.78 ± 0.1 | 1.8 ± 0.1 |
| D2C | 9.7 ± 0.6 | 0.68 ± 0.1 | 1.6 ± 0.2 |  | D2CO | 10.3 ± 2.1 | 0.68 ± 0.0 | 1.6 ± 0.2 |
| N2C | 8.7 ± 1.5 | 0.74 ± 0.1 | 1.6 ± 0.1 |  | N2CO | 10.3 ± 1.5 | 0.71 ± 0.0 | 1.6 ± 0.1 |
| D1G | 5.0 ± 0.9 | 0.61 ± 0.0 | 1.0 ± 0.2 |  | D1GO | 9.7 ± 0.6 | 0.66 ± 0.1 | 1.5 ± 0.2 |
| N1G | 9.0 ± 0.9 | 0.66 ± 0.1 | 1.5 ± 0.2 |  | N1GO | 9.3 ± 2.3 | 0.63 ± 0.1 | 1.4 ± 0.2 |
| D2G | 6.3 ± 3.2 | 0.68 ± 0.1 | 1.2 ± 0.4 |  | D2GO | 11.0 ± 2.6 | 0.72 ± 0.2 | 1.7 ± 0.2 |
| N2G | 10.0 ± 1.5 | 0.62 ± 0.0 | 1.5 ± 0.2 |  | N2GO | 9.3 ± 1.2 | 0.64 ± 0.1 | 1.4 ± 0.3 |
| D1S | 9.7 ± 0.6 | 0.73 ± 0.0 | 1.7 ± 0.1 |  | D1SO | 11.7 ± 1.5 | 0.73 ± 0.0 | 1.8 ± 0.1 |
| N1S | 10.0 ± 1.0 | 0.70 ± 0.0 | 1.6 ± 0.1 |  | N1SO | 12.0 ± 1.0 | 0.75 ± 0.1 | 1.8 ± 0.1 |
| D2S | 9.7 ± 2.5 | 0.73 ± 0.1 | 1.6 ± 0.1 |  | D2SO | 11.0 ± 2.0 | 0.72 ± 0.0 | 1.7 ± 0.1 |
| N2S | 10 ± 0.7 | 0.69 ± 0.1 | 1.6 ± 0.1 |  | N2SO | 10.3 ± 0.6 | 0.70 ± 0.0 | 1.6 ± 0.1 |
|  |  |  |  |  |  |  |  |  |
| **Large Fraction** | |  |  |  |  |  |  |  |
| *Onshore* |  |  |  |  | *Offshore* |  |  |  |
| Sample | *S* | *J'* | *H'* |  | Sample | *S* | *J'* | *H'* |
| D1C | 21.3 ± 2.5 | 0.56 ± 0.4 | 1.8 ± 1.1 |  | D1CO | 14.0 ± 0.0 | 0.88 ± 0.0 | 2.5 ± 0.0 |
| N1C | 23.3 ± 0.6 | 0.70 ± 0.2 | 2.2 ± 0.6 |  | N1CO | 28.3 ± 3.2 | 0.82 ± 0.0 | 2.7 ± 0.2 |
| D2C | 23.7 ± 4.6 | 0.77 ± 0.1 | 2.4 ± 0.5 |  | D2CO | 21.0 ± 0.0 | 0.81 ± 0.0 | 2.5 ± 0.0 |
| N2C | 21.3 ± 3.1 | 0.83 ± 0.0 | 2.5 ± 0.2 |  | N2CO | 28.0 ± 1.7 | 0.85 ± 0.0 | 2.8 ± 0.1 |
| D1G | 7.0 ± 1.0 | 0.77 ± 0.2 | 1.5 ± 0.4 |  | D1GO | 19.7 ± 2.5 | 0.85 ± 0.0 | 2.5 ± 0.1 |
| N1G | 15.0 ± 0.1 | 0.91 ± 0.0 | 2.5 ± 0.0 |  | N1GO | 29.0 ± 2.6 | 0.72 ± 0.1 | 2.4 ± 0.3 |
| D2G | 7.3 ± 4.6 | 0.97 ± 0.0 | 1.7 ± 0.9 |  | D2GO | 18.3 ± 3.2 | 0.80 ± 0.1 | 2.3 ± 0.1 |
| N2G | 16.0 ± 5.6 | 0.91 ± 0.0 | 2.5 ± 0.3 |  | N2GO | 26.0 ± 2.0 | 0.77 ± 0.0 | 2.5 ± 0.2 |
| D1S | 19.0 ± 2.0 | 0.77 ± 0.1 | 2.3 ± 0.2 |  | D1SO | 22.0 ± 2.6 | 0.81 ± 0.0 | 2.5 ± 0.1 |
| N1S | 27.3 ± 2.5 | 0.67 ± 0.1 | 2.2 ± 0.5 |  | N1SO | 29.3 ± 1.5 | 0.75 ± 0.0 | 2.6 ± 0.1 |
| D2S | 32.0 ± 2.6 | 0.74 ± 0.1 | 2.6 ± 0.4 |  | D2SO | 24.7 ± 3.5 | 0.84 ± 0.0 | 2.7 ± 0.1 |
| N2S | 25.0 ± 2.7 | 0.70 ± 0.1 | 2.6 ± 0.2 |  | N2SO | 30.0 ± 0.9 | 0.85 ± 0.0 | 2.8 ± 0.1 |

Appendix D. Mean (±SE) abundance (individuals m-3) of small zooplankton from the different sampling sites and day-night sampling times. # - top 10 most abundant taxa. Values x 1000. – - no occurrence.

|  | CORAL |  |  |  | SEAGRASS | |  | SAND |  |  |  |  |
| --- | --- | --- | --- | --- | --- | --- | --- | --- | --- | --- | --- | --- |
|  | Inshore |  | Offshore |  | Inshore |  | Offshore |  | Inshore |  | Offshore |  |
| TAXON | Daytime | Nighttime | Daytime | Nighttime | Daytime | Nighttime | Daytime | Nighttime | Daytime | Nighttime | Daytime | Nighttime |
|  |  |  |  |  |  |  |  |  |  |  |  |  |
| Calanoid C1-C5# | 10.2±2.1 | 8.7±1.3 | 7.2±1.5 | 8.7±1.0 | 1.6±1.1 | 1.7±0.5 | 2.4±1.1 | 2.5±0.9 | 10.4±2.5 | 9.7±0.8 | 6.9±2.0 | 8.0±1.1 |
| *Oithona* C1-C5# | 10.5±1.4 | 10.2±1.4 | 6.4±1.6 | 4.9±1.7 | 2.6±0.9 | 2.9±0.5 | 3.1±0.9 | 3.5±0.8 | 6.3±0.7 | 8.1±1.0 | 6.6±1.5 | 7.0±0.6 |
| Copepod nauplii# | 7.9±1.8 | 10.2±0.9 | 5.1±1.0 | 8.8±0.7 | 3.0±1.2 | 3.4±1.0 | 2.3±1.2 | 2.5±1.1 | 5.0±0.7 | 7.4±0.6 | 4.3±0.8 | 4.9±0.9 |
| Appendicularia # | 2.9±0.6 | 4.7±1.3 | 2.5±0.4 | 4.9±0.5 | 1.2±0.5 | 0.9±0.2 | 1.4±0.5 | 1.2±0.4 | 3.8±0.5 | 3.8±0.6 | 4.5±0.5 | 4.6±0.6 |
| *Oithona nana*# | 2.8±0.5 | 3.3±0.4 | 2.5±0.4 | 3.5±0.3 | 0.8±0.4 | 0.6±0.2 | 1.1±0.5 | 1.1±0.4 | 4.2±0.6 | 3.8±0.5 | 3.6±0.6 | 3.8±0.3 |
| *Parvocalanus elegans*# | 2.6±0.6 | 3.3±0.5 | 2.3±0.4 | 3.0±0.5 | 0.3±0.2 | 0.5±0.1 | 1.1±0.6 | 0.6±0.2 | 5.1±1.3 | 3.4±0.3 | 3.0±1.0 | 2.8±0.4 |
| Bivalve larvae# | 2.8±0.9 | 3.1±0.9 | 1.6±1.0 | 3.4±0.8 | 1.1±1.1 | <0.1 | 1.1±1.1 | 1.1±1.1 | 2.0±0.9 | 1.0±0.4 | 2.0±0.9 | 1.7±0.9 |
| Gastropoda larvae# | 2.1±0.8 | 2.5±0.3 | 1.8±0.8 | 2.5±0.6 | 1.0±0.9 | 0.1±0.0 | 1.0±0.9 | 1.0±0.9 | 1.7±0.8 | 1.7±0.5 | 2.9±0.6 | 2.2±0.7 |
| *Oithona simplex*# | 2.1±0.6 | 2.6±0.3 | 1.4±0.6 | 2.0±0.3 | 0.3±0.1 | 0.7±0.1 | 0.8±0.4 | 0.9±0.2 | 2.2±0.5 | 2.8±0.3 | 2.4±0.6 | 1.8±0.5 |
| Polychaete larvae# | 0.8±0.2 | 1.6±0.2 | 1.2±0.3 | 1.0±0.3 | 0.4±0.2 | 0.2±0.0 | 0.3±0.2 | 0.3±0.2 | 0.8±0.2 | 1.1±0.1 | 1.4±0.2 | 1.3±0.1 |
| Poecilostomatoid C1-C5# | 0.9±0.2 | 0.9±0.2 | 1.2±0.3 | 1.5±0.3 | 0.3±0.2 | 0.2±0.1 | 0.5±0.1 | 0.4±0.1 | 0.7±0.1 | 0.7±0.1 | 0.9±0.2 | 1.2±0.2 |
| *Oncaea* spp. # | 0.8±0.4 | 0.5±0.1 | 0.8±0.4 | 0.6±0.4 | 0.4±0.4 | 0.1±0.0 | 0.5±0.4 | 0.5±0.4 | 0.9±0.4 | 0.2±0.1 | 1.1±0.3 | 1.0±0.4 |
| Ostracoda | 0.1±0.0 | – | 0.1±0.0 | 0.2±0.1 | <0.1 | <0.1 | <0.1 | <0.1 | 0.1±0.0 | 0.1±0.0 | 0.1±0.1 | 0.1±0.0 |
| Chaetognatha | 0.3±0.1 | 0.4±0.1 | 0.5±0.2 | 0.5±0.2 | <0.1 | <0.1 | 0.1±0.0 | <0.1 | 0.5±0.2 | 0.5±0.1 | 0.5±0.1 | 0.5±0.1 |
| Isopoda | <0.1 | 0.1±0.0 | – | – | – | <0.1 | <0.1 | <0.1 | – | <0.1 | – | – |
| Decapod larvae | <0.1 | 0.1±0.1 | <0.1 | 0.2±0.1 | – | – | <0.1 | 0 | 0.1±0.1 | 0.2±0.1 | 0.1±0.0 | 0.1±0.1 |
| Barnacle larvae | 0.8±0.3 | 0.2±0.1 | 0.2±0.1 | 0.3±0.1 | 0.2±0.1 | <0.1 | 0.2±0.1 | 0.2±0.1 | 0.1±0.1 | 0.2±0.1 | 0.3±0.1 | 0.3±0.1 |
| Cladocera | – | – | <0.1 | – | – | – | – | – | – | – | – | – |
| Amphipoda | – | – | – | – | <0.1 | – | – | – | – | – | – | – |
| Order Calanoida: |  |  |  |  |  |  |  |  |  |  |  |  |
| *Paracalanus parvus* | – | – | – | – | – | – | <0.1 | – | – | – | 0.1±0.0 | <0.1 |
| *Paracalanus aculeatus* | – | – | – | – | – | – | – | <0.1 | – | – | <0.1 | – |
| *Parvocalanus crassiro.* | – | – | – | 0.1±0.0 | – | – | – | – | <0.1 | – | <0.1 | – |
| *Bestiolina similis* | 0.1±0.1 | – | – | 0.1±0.0 | – | – | – | – | – | – | 0.1±0.0 | – |
| *Acrocalanus gibber* | <0.1 | 0.1±0.0 | – | 0 | – | – | – | – | – | – | – | – |
| *Metacalanus* sp. | – | – | <0.1 | <0.1 | – | <0.1 | <0.1 | <0.1 | <0.1 | 0.1±0.0 | – | 0.1±0.0 |
| *Pseudocyclops* sp. | – | – | – | – | – | – | <0.1 | – | – | – | – | – |
| Calanoida spp. | <0.1 | – | – | – | – | – | – | – | – | – | – | – |
| Order Cyclopoida: |  |  |  |  |  |  |  |  |  |  |  |  |
| *Oithona attenuata* | 0.1±0.0 | 0.2±0.1 | 0.2±0.0 | 0.1±0.1 | <0.1 | <0.1 | <0.1 | <0.1 | 0.3±0.1 | 0.1±0.0 | 0.1±0.0 | 0.1±0.1 |
| *Oithona decipiens* | – | – | – | – | – | <0.1 | – | – | – | – | – | – |
| *Oithona plumifera* | – | – | – | – | – | <0.1 | <0.1 | <0.1 | – | – | <0.1 | – |
| *Oithona rigida* | <0.1 | 0.2±0.1 | 0.1±0.0 | 0.1±0.0 | – | – | – | <0.1 | <0.1 | 0.1±0.0 | 0.2±0.1 | 0.1±0.1 |
| *Corycaeus* spp. | 0.6±0.1 | 0.3±0.1 | 0.4±0.1 | 0.5±0.1 | 0.2±0.1 | 0.1±0.0 | 0.3±0.1 | 0.2±0.1 | 0.5±0.1 | 0.2±0.1 | 0.6±0.1 | 0.6±0.1 |
| *Kelleria* sp. | – | – | – | – | – | <0.1 | – | <0.1 | – | – | – | – |
| *Sapphirella*-type copep. | 0.1±0.0 | – | <0.1 | 0.1±0.0 | <0.1 | <0.1 | <0.1 | <0.1 | 0.1±0.0 | 0.1±0.0 | <0.1 | <0.1 |
| Order Harpacticoida: |  |  |  |  |  |  |  |  |  |  |  |  |
| Harpacticoid C1-C5 | 0.5±0.1 | 1.1±0.1 | 0.6±0.1 | 1.2±0.2 | 0.1±0.1 | 0.4±0.2 | 0.1±0.1 | 0.2±0.1 | 0.8±0.2 | 1.3±0.2 | 0.4±0.1 | 0.5±0.1 |
| *Clytemnestra scuttelata* | – | – | – | – | – | – | <0.1 | – | – | – | – | <0.1 |
| *Euterpina acutifrons* | 0.4±0.1 | 0.4±0.1 | 0.3±0.1 | 0.3±0.1 | <0.1 | 0.1±0.0 | 0.1±0.0 | 0.1±0.0 | 0.3±0.1 | 0.7±0.1 | 0.6±0.2 | 0.6±0.1 |
| *Microsetella norvegica* | 0.3±0.1 | 0.6±0.3 | 0.2±0.1 | 0.8±0.3 | 0.1±0.1 | 0.2±0.0 | 0.2±0.1 | 0.2±0.1 | 0.2±0.1 | 0.3±0.1 | 0.3±0.2 | 0.8±0.4 |
| *Macrosetella gracilis* | – | <0.1 | – | – | – | <0.1 | <0.1 | – | – | <0.1 | <0.1 | – |
| *Metis* sp. | – | <0.1 | <0.1 | <0.1 | – | – | – | – | 0.1±0.1 | <0.1 | <0.1 | – |
| Harpacticoida spp. | – | 0.1±0.1 | – | – | – | <0.1 | – | <0.1 | – | – | – | – |
| Total | 49.8±6.2 | 55.3±5.3 | 36.6±7.4 | 49.3±3.6 | 13.8±7.3 | 12.3±2.4 | 16.7±7.1 | 16.5±6.8 | 46.2±5.6 | 47.5±4.4 | 42.7±6.8 | 44.2±3.2 |

Appendix E Mean (±SE) number of individuals m-3 of large fraction zooplankton taxa from the different sampling sites and day-night sampling times. # - top 10 most abundant taxa. Values x 100. – - no occurrence.

|  | CORAL |  |  |  | SEAGRASS | |  |  | SAND |  |  |  |
| --- | --- | --- | --- | --- | --- | --- | --- | --- | --- | --- | --- | --- |
|  | Inshore |  | Offshore |  | Inshore |  | Offshore |  | Inshore |  | Offshore |  |
| TAXON | Daytime | Nighttime | Daytime | Nighttime | Daytime | Nighttime | Daytime | Nighttime | Daytime | Nighttime | Daytime | Nighttime |
|  |  |  |  |  |  |  |  |  |  |  |  |  |
| Copepod C1-C5# | 5.0±1.0 | 4.3±0.8 | 5.7±1.5 | 5.6±0.8 | 6.1±3.5 | 13.0±3.3 | 9.2±2.2 | 27.7±3.5 | 17.1±3.4 | 16.3±2.6 | 10.5±1.7 | 11.2±1.6 |
| Echinoderm larva# | <0.1 | 0.2±0.1 | 2.5±1.0 | <0.1 | 35.9±15.4 | 3.2±1.0 | 12.9±4.0 | 2.3±0.4 | 0.8±0.1 | 1.5±0.5 | 0.9±0.5 | 1.1±0.3 |
| Chaetognatha# | 0.8±0.3 | 2.4±0.3 | 5.5±1.6 | 2.7±0.6 | 0.4±0.1 | 1.6±0.5 | 1.6±0.5 | 1.5±0.3 | 4.9±1.0 | 3.8±1.1 | 5.2±1.0 | 5.9±0.5 |
| Appendicularia# | 0.2±0.2 | 0.7±0.5 | 0.4±0.2 | 0.2±0.1 | 0.5±0.2 | 2.3±0.9 | 3.3±1.7 | 2.6±0.6 | 3.9±0.7 | 4.9±1.3 | 3.0±0.7 | 5.6±0.5 |
| *Metis* sp.# | 5.0±4.7 | 0.1±0.0 | 5.0±2.2 | 0.1±0.0 | – | – | – | – | 0.5±0.1 | 1.3±0.6 | 0.2±0.1 | 0.1±0.0 |
| Copepod nauplii# | 0.2±0.1 | 0.2±0.1 | 0.7±0.2 | 0.1±0.1 | 0.9±0.5 | 0.3±0.1 | 0.2±0.0 | 0.8±0.3 | 2.8±0.3 | 1.8±0.6 | 0.5±0.3 | 0.5±0.1 |
| Polychaeta larva# | – | <0.1 | – | – | – | <0.1 | – | – | – | – | – | – |
| Cirriped larva# | – | 0.5±0.2 | 0.3±0.2 | 0.0±0.0 | 0.8±0.5 | 1.1±0.3 | 0.5±0.1 | 1.0±0.3 | 0.3±0.1 | 0.1±0.1 | 1.0±0.8 | 1.0±0.4 |
| Ostracoda# | 0.1±0.1 | 0.2±0.1 | 0.2±0.1 | 0.4±0.1 | 0.1±0.0 | 1.3±0.5 | 0.3±0.1 | 0.4±0.1 | <0.1 | 0.3±0.1 | 0.5±0.3 | 2.0±1.6 |
| Other decapod larva# | – | 1.1±0.3 | 0.5±0.1 | 0.4±0.2 | <0.1 | 0.2±0.1 | 0.1±0.0 | 0.3±0.1 | 0.2±0.1 | 1.4±0.3 | 0.8±0.2 | 0.9±0.3 |
| Molluscan larvae# | – | – | <0.1 | – | 0.1±0.0 | 0.2±0.1 | 0.6±0.6 | 0.2±0.1 | 2.5±1.8 | 1.4±0.6 | 0.2±0.1 | 0.0±0.0 |
| *Microsetella norvegica*# | 0.1±0.1 | <0.1 | – | 0.1±0.0 | 1.6±1.4 | 0.3±0.2 | 0.5±0.3 | 0.7±0.2 | <0.1 | 0.1±0.0 | <0.1 | 0.3±0.1 |
| Polychaeta larva | <0.1 | 0.2±0.1 | 0.6±0.2 | 0.1±0.0 | 0.6±0.3 | 0.2±0.0 | 0.5±0.2 | 0.8±0.4 | 2.0±0.2 | 1.1±0.3 | 1.3±0.4 | 0.8±0.2 |
| Cnidaria | <0.1 | <0.1 | <0.1 | <0.1 | 0.4±0.2 | 0.1±0.0 | 0.2±0.0 | <0.1 | 0.2±0.1 | 0.1±0.1 | 0.2±0.1 | 0.1±0.1 |
| Ctenophora | – | – | – | – | – | 0.1±0.1 | – | – | – | – | – | – |
| Pteropoda | – | <0.1 | – | 0.6±0.2 | <0.1 | 0.1±0.1 | – | – | – | – | – | – |
| Heteropoda | – | – | – | – | – | – | – | <0.1 | – | – | – | – |
| Cyphonautes larva | – | <0.1 | – | <0.1 | – | <0.1 | <0.1 | 0.2±0.1 | – | – | – | – |
| Actinotrocha larva | <0.1 | – | – | – | <0.1 | – | <0.1 | <0.1 | – | – | – | – |
| Cladocera | <0.1 | <0.1 | 0.4±0.1 | <0.1 | – | <0.1 | 0.2±0.1 | <0.1 | 0.1±0.0 | <0.1 | 0.2±0.1 | 0.1±0.1 |
| Amphipoda | – | <0.1 | <0.1 | <0.1 | – | 0.1±0.0 | <0.1 | <0.1 | – | 0.1±0.1 | – | 0.1±0.1 |
| Cumacea | – | <0.1 | – | 0.1±0.1 | – | 0.1±0.0 | – | 0.1±0.0 | – | 0.1±0.0 | – | – |
| Isopoda | – | <0.1 | – | <0.1 | <0.1 | 0.1±0.1 | – | 0.1±0.0 | – | <0.1 | – | – |
| Anomuran larva | – | <0.1 | <0.1 | <0.1 | – | <0.1 | – | <0.1 | – | <0.1 | – | – |
| Bracyuran larva | <0.1 | 0.1±0.1 | 0.2±0.1 | 0.2±0.0 | <0.1 | 0.4±0.2 | <0.1 | 0.5±0.3 | 0.2±0.1 | 0.3±0.2 | 0.2±0.1 | 0.3±0.3 |
| Mysida | <0.1 | 0.9±0.2 | <0.1 | 0.3±0.2 | – | 0.7±0.4 | – | 0.8±0.8 | – | 0.4±0.2 | – | 0.2±0.2 |
| Salpida | – | – | – | – | – | – | – | – | – | – | <0.1 | <0.1 |
| Fish larva | <0.1 | <0.1 | <0.1 | 0.1±0.0 | – | <0.1 | <0.1 | <0.1 | <0.1 | <0.1 | <0.1 | – |
| Fish egg | <0.1 | <0.1 | <0.1 | <0.1 | <0.1 | <0.1 | <0.1 | <0.1 | 0.1±0.1 | – | <0.1 | 0.1±0.1 |
| Luciferidae | <0.1 | – | 0.2±0.1 | 0.7±0.3 | – | – | – | <0.1 | 0.4±0.1 | 0.7±0.1 | 0.1±0.1 | 0.6±0.2 |
| Caridean | 0.1±0.0 | – | – | 0.2±0.1 | – | – | – | – | – | – | – | – |
| Platyhelminth larva | – | 0.1±0.0 | – | – | – | – | – | – | – | – | – | – |
| Brachiopoda larva | – | <0.1 | – | – | – | – | <0.1 | – | – | – | – | – |
| Pycnognoids | – | <0.1 | – | – | – | – | – | – | – | – | – | – |
| Asteroida (juvenile) | – | <0.1 | – | – | – | – | – | – | – | – | – | – |
| Cephalochordata larva | – | <0.1 | – | – | – | – | – | – | – | – | – | – |
| Gastropod veliger | – | <0.1 | – | – | – | <0.1 | <0.1 | <0.1 | – | – | – | – |
| Radiolaria | – | <0.1 | – | – | – | – | – | – | – | – | – | – |
| Sipuncula larva | – | – | – | – | – | <0.1 | – | – | – | – | – | – |
| Tanaids | – | – | – | – | – | <0.1 | – | – | – | – | – | – |
| Nematodes | – | – | – | – | – | <0.1 | <0.1 | – | – | – | – | – |
| Amphioxus | – | – | – | – | – | – | <0.1 | – | – | – | – | – |
| Tadpole | – | – | – | – | – | – | <0.1 | <0.1 | – | – | – | – |
| Euphausiids | – | – | – | – | – | – | <0.1 | – | – | – | – | – |
| Stomatopod | – | – | – | – | – | – | <0.1 | <0.1 | – | – | – | – |
| Pilidium | – | – | – | – | – | – | <0.1 | – | – | – | – | – |
| Radiolaria | – | <0.1 | <0.1 | – | – | – | – | – | – | – | – | – |
| Unknown | <0.1 | – | – | – | 0.3±0.2 | – | – | <0.1 | – | – | – | – |
| Order Calanoida: |  |  |  |  |  |  |  |  |  |  |  |  |
| *Acartia erythraea* | – | <0.1 | <0.1 | – | – | <0.1 | <0.1 | <0.1 | <0.1 | <0.1 | 0.2±0.1 | <0.1 |
| *Acartia pacifica* | <0.1 | 0.3±0.1 | 0.2±0.1 | 0.3±0.1 | <0.1 | 0.1±0.1 | 0.5±0.1 | 0.3±0.1 | 0.3±0.1 | 0.2±0.1 | 0.6±0.1 | 0.3±0.1 |
| *Acrocalanus gibber* | 0.5±0.2 | 0.1±0.0 | <0.1 | 0.3±0.2 | <0.1 | 0.1±0.0 | 0.1±0.0 | 0.2±0.1 | 0.8±0.2 | 0.6±0.2 | 0.5±0.2 | 0.3±0.1 |
| *Acrocalanus gracilis* | – | – | – | – | – | – | <0.1 | <0.1 | – | – | – | – |
| *Anawekia* sp. | – | – | – | <0.1 | – | – | – | – | – | <0.1 | – | – |
| *Bestiolina cf. similis* | – | <0.1 | – | – | – | – | – | – | <0.1 | <0.1 | – | – |
| *Calanopia aurivillli* | <0.1 | 0.6±0.3 | – | 0.3±0.1 | – | <0.1 | – | 0.1±0.1 | <0.1 | 1.8±0.6 | <0.1 | 0.2±0.1 |
| *Calanopia australica* | – | – | – | <0.1 | – | – | – | – | – | – | – | – |
| *Calanopia elliptica* | – | 0.1±0.0 | – | 0.1±0.0 | – | – | – | 0.1±0.0 | – | 0.1±0.1 | <0.1 | 0.1±0.0 |
| *Calanopia thompsonii* | – | – | – | <0.1 | – | – | – | – | <0.1 | <0.1 | – | – |
| *Calocalanus* sp. | – | – | – | – | – | – | – | – | – | <0.1 | – | – |
| *Candacia bradyi* | – | – | <0.1 | <0.1 | – | – | – | <0.1 | – | <0.1 | – | <0.1 |
| *Canthocalanus pauper* | <0.1 | <0.1 | <0.1 | <0.1 | – | <0.1 | 0.1±0.0 | <0.1 | 0.1±0.1 | 0.1±0.0 | 0.2±0.1 | <0.1 |
| *Centropages furcatus* | <0.1 | <0.1 | <0.1 | <0.1 | – | – | – | 0.1±0.0 | 0.3±0.1 | 0.2±0.2 | 0.2±0.1 | 0.1±0.0 |
| *Centropages orsini* | – | – | <0.1 | <0.1 | – | <0.1 | <0.1 | <0.1 | – | – | <0.1 | – |
| *Centropages tenuiremis* | – | – | – | – | – | – | – | <0.1 | – | – | – | – |
| *Delius* sp. | <0.1 | – | – | – | – | – | – | – | – | – | <0.1 | – |
| *Labidocera acuta* | – | – | – | – | – | – | – | – | – | – | – | 0.1±0.1 |
| *Labidocera bengalensis* | <0.1 | – | <0.1 | – | – | <0.1 | <0.1 | <0.1 | <0.1 | <0.1 | <0.1 | <0.1 |
| *Labidocera kroyeri* | – | – | – | <0.1 | – | – | – | – | – | – | – | <0.1 |
| *Labidocera minuta* | <0.1 | – | – | <0.1 | – | – | <0.1 | <0.1 | – | – | 0.2±0.1 | – |
| *Metacalanus aurivilli* | <0.1 | <0.1 | – | <0.1 | – | 0.1±0.0 | 0.1±0.0 | 0.1±0.0 | <0.1 | <0.1 | – | 0.4±0.2 |
| *Paracalanus aculeatus* | <0.1 | <0.1 | – | 0.1±0.1 | – | 0.1±0.1 | 0.2±0.1 | 0.4±0.2 | 0.7±0.3 | 0.3±0.1 | 0.5±0.1 | 0.3±0.1 |
| *Paracalanus denudatus* | – | <0.1 | – | – | – | – | – | – | – | – | <0.1 | – |
| *Parvocalanus elegans* | 0.2±0.1 | – | – | <0.1 | <0.1 | 0.1±0.1 | 0.2±0.1 | 0.1±0.1 | 0.1±0.1 | <0.1 | <0.1 | – |
| *Parv. crassirostris* | 0.4±0.2 | – | – | 0.1±0.0 | 0.2±0.2 | 0.2±0.1 | 0.2±0.1 | 0.7±0.4 | 0.4±0.2 | 0.2±0.2 | 0.3±0.1 | 0.2±0.1 |
| *Pontellopsis herdmani* | – | – | – | <0.1 | – | – | – | – | <0.1 | – | – | – |
| *Pontellopsis krameri* | <0.1 | – | – | – | – | – | – | – | – | – | – | – |
| *Pontellopsis macronyx* | <0.1 | – | – | – | – | – | <0.1 | – | – | <0.1 | <0.1 | – |
| *Pseudocyclops* sp. | <0.1 | – | – | – | – | <0.1 | – | – | – | – | – | – |
| *Pseudodiaptomus clevei* | – | – | <0.1 | – | – | – | – | – | – | <0.1 | <0.1 | – |
| *Pseudod. incisus* | <0.1 | – | – | – | – | – | – | – | <0.1 | – | – | – |
| *Subeucalanus subtenuis* | <0.1 | – | – | <0.1 | – | – | – | – | – | – | – | – |
| *Subeucalanus subcrass.* | <0.1 | <0.1 | 0.3±0.1 | <0.1 | – | 0.1±0.0 | <0.1 | 0.1±0.0 | 0.1±0.1 | 0.1±0.0 | 0.2±0.1 | 0.2±0.1 |
| *Temora discaudata* | <0.1 | <0.1 | <0.1 | <0.1 | – | <0.1 | <0.1 | – | 0.3±0.1 | 0.1±0.0 | <0.1 | <0.1 |
| *Temora turbinata* | 0.1±0.1 | – | <0.1 | 0.1±0.0 | – | <0.1 | <0.1 | <0.1 | 0.2±0.2 | 0.3±0.2 | 0.1±0.0 | <0.1 |
| *Tortanus barbatus* | – | – | – | – | – | – | <0.1 | – | – | – | – | <0.1 |
| *Tortanus forcipatus* | <0.1 | – | <0.1 | <0.1 | – | <0.1 | – | <0.1 | <0.1 | – | <0.1 | <0.1 |
| *Tortanus gracilis* | <0.1 | <0.1 | – | – | – | <0.1 | – | <0.1 | <0.1 | <0.1 | 0 | <0.1 |
| *Tortanus* spp. | <0.1 | – | – | – | – | – | – | <0.1 | – | – | – | – |
| Unknown Calanoida | <0.1 | – | – | – | 0.3±0.1 | – | – | <0.1 | – | – | – | – |
| Order Cyclopoida: |  |  |  |  |  |  |  |  |  |  |  |  |
| *Oithona attenuata* | – | – | <0.1 | – | – | – | – | 0.3±0.2 | <0.1 | <0.1 | <0.1 | – |
| *Oithona decipiens* | – | <0.1 | – | – | – | – | – | <0.1 | – | <0.1 | – | – |
| *Oithona nana* | – | – | – | <0.1 | – | – | 0.3±0.1 | 1.0±0.5 | <0.1 | – | – | 0.2±0.1 |
| *Oithona oculata* | – | – | – | <0.1 | – | – | 0.1±0.0 | <0.1 | <0.1 | – | <0.1 | – |
| *Oithona plumifera* | 0.1±0.1 | – | – | 0.1±0.0 | – | 0.1±0.0 | 0.3±0.1 | 0.2±0.1 | – | – | 0.1±0.1 | 0.1±0.1 |
| *Oithona rigida* | 0.1±0.0 | 0.1±0.0 | <0.1 | <0.1 | 0.1±0.1 | 0.1±0.1 | <0.1 | 0.5±0.1 | 0.3±0.1 | 0.5±0.1 | 0.4±0.1 | 0.9±0.2 |
| *Oithona setigera* | – | <0.1 | – | – | – | – | – | – | – | – | – | – |
| *Oithona simplex* | – | <0.1 | – | – | <0.1 | 0.1±0.1 | 0.1±0.1 | 1.4±0.7 | <0.1 | <0.1 | – | 0.1±0.1 |
| Order Harpacticoida: |  |  |  |  |  |  |  |  |  |  |  |  |
| *Lubbockia* spp. | <0.1 | – | – | – | – | – | – | – | – | 0.1±0.1 | – | – |
| *Clytemnestra scutellata* | <0.1 | – | – | – | <0.1 | – | <0.1 | – | – | <0.1 | – | <0.1 |
| *Eudactylops latipes* | – | – | – | <0.1 | <0.1 | <0.1 | 0 | <0.1 | – | <0.1 | – | <0.1 |
| *Euterpina acutifrons* | – | <0.1 | – | <0.1 | 0.1±0.1 | 0.2±0.2 | 0.1±0.1 | 0.9±0.2 | 0.2±0.1 | 0.1±0.1 | 0.1±0.0 | 0.1±0.0 |
| *Macrosetella gracilis* | <0.1 | – | <0.1 | <0.1 | 0.3±0.2 | 0.1±0.1 | 0.1±0.0 | 0.1±0.0 | <0.1 | <0.1 | 0.1±0.1 | 0.1±0.1 |
| *Microsetella rosea* | – | <0.1 | – | 0.1±0.0 | – | – | 0.2±0.1 | <0.1 | 0.1±0.1 | 0.3±0.1 | <0.1 | 0.5±0.2 |
| other harpacticoids | – | 0.1±0.0 | – | <0.1 | – | 0.1±0.1 | – | 0.3±0.1 | – | 0.2±0.1 | – | – |
| Order Poicilostomatoida: |  |  |  |  |  |  |  |  |  |  |  |  |
| *Copilia* sp. | <0.1 | – | – | – | – | – | – | <0.1 | – | – | – | – |
| *Corycaeus andrewsi* | 0.1±0.0 | 0.1±0.0 | – | <0.1 | <0.1 | – | 0.1±0.0 | 0.1±0.1 | <0.1 | – | – | – |
| *Corycaeus asiaticus* | – | – | 0.1±0.0 | 0.1±0.0 | 0.2±0.2 | 0.2±0.1 | 0.3±0.1 | 0.4±0.1 | 0.4±0.1 | 0.3±0.1 | 0.8±0.1 | 0.2±0.1 |
| *Corycaeus catus* | <0.1 | <0.1 | <0.1 | – | – | – | <0.1 | – | <0.1 | <0.1 | <0.1 | – |
| *Corycaeus crassiusculus* | 0.1±0.1 | <0.1 | <0.1 | <0.1 | – | – | <0.1 | – | 0.1±0.1 | 0.2±0.1 | 0.3±0.1 | 0.2±0.1 |
| *Corycaeus erythraeus* | <0.1 | 0.1±0.0 | <0.1 | <0.1 | – | <0.1 | – | 0.1±0.1 | 0.1±0.1 | 0.2±0.1 | 0.3±0.1 | 0.1±0.1 |
| Corycaeus dahli | <0.1 | <0.1 | – | <0.1 | – | – | – | <0.1 | <0.1 | – | – | – |
| *Corycaeus latus* | <0.1 | <0.1 | – | – | – | – | – | – | – | – | – | – |
| *Corycaeus lubbocki* | <0.1 | <0.1 | <0.1 | – | – | – | <0.1 | – | – | – | – | – |
| *Corycaeus speciosus* | – |  | <0.1 | – |  | – | – | – | – |  |  | – |
| *Corycaeus* spp. | <0.1 |  | – |  | – |  | <0.1 | <0.1 | – | <0.1 |  | 0.1±0.0 |
| *Farranula gibbula* | 0.1±0.0 | – |  | <0.1 |  | <0.1 | <0.1 | – | <0.1 |  | <0.1 | 0.1±0.1 |
| *Farranula concinna* | – |  | – |  | – |  | – | – | – | <0.1 |  | – |
| *Kerellia* spp. | <0.1 |  | <0.1 | – |  | <0.1 | <0.1 | <0.1 | – |  |  | 0.3±0.1 |
| *Oncaea conifera* | <0.1 |  | <0.1 | – |  | <0.1 | 0.1±0.1 | 0.2±0.1 | 0.5±0.1 | 1.1±0.4 | 0.4±0.1 | 0.3±0.0 |
| *Oncaea mediterranea* | – |  | <0.1 | – |  | – | – | – | – |  |  | – |
| *Oncaea* spp. | 0.1±0.0 | <0.1 | – |  | <0.1 | <0.1 | – | 0.1±0.0 | – |  | – |  |
| other poecilostomatoids | – |  | – |  | – |  | <0.1 | – | – | – |  |  |
| Total | 13.9±5.0 | 12.9±2.1 | 23.0±2.4 | 13.8±1.9 | 49.6±20.8 | 27.3±6.5 | 34.0±5.6 | 49.0±5.5 | 41.7±6.9 | 42.1±5.2 | 31.4±5.9 | 36.3±4.1 |
